# Supplementary material for: Health disparities in COVID-19: immune and vascular changes are linked to disease severity and persist in a high-risk population in Riverside County, California
Source: Springer Nature journal article supplement (doi:10.1186/s12889-023-16462-5), 2023-08-19

**Supplemental Figure 1: Confirmation of active COVID-19 infection for severe and moderate infection**

**groups.** A) Quantification of viral burden from nasal swab of severe and moderate infection groups. B)

Quantification of blood spike protein in severely infected participants based on survival vs fatality from infection.

**Supplemental Figure 2: Full gating strategy for whole blood flow cytometry.** Concatenated healthy control sample used as in Figure 2.

**Supplemental Figure 3. Flow plots of significantly altered immune cell types by study group.** A-C) Flow plots of major immune cell populations analyzed for control(A), moderate infection (B), and severe infection (C) groups (all individual samples concatenated by group for shown plots).

**Supplemental Figure 4: Correlation matrices of demographic, immune, and endothelial parameters in severe COVID-19 infection with fatal and non-fatal outcomes.** A) Fatal outcome correlation matrix. B) Survival outcome correlation matrix.

**Supplemental Figure 5. Significantly altered immune cell types and long COVID symptoms in Recovered group.** A) Flow plots of major immune cell populations analyzed for moderate recovered group (all individual samples concatenated by group for shown plots). B) Correlation of self-reported COVID-19 symptoms associated with long COVID identified as significantly altered prior to multiple comparison corrections as assessed by YRS questionnaire (n=23); points are slightly jittered for visibility.

Supplemental Figure 1

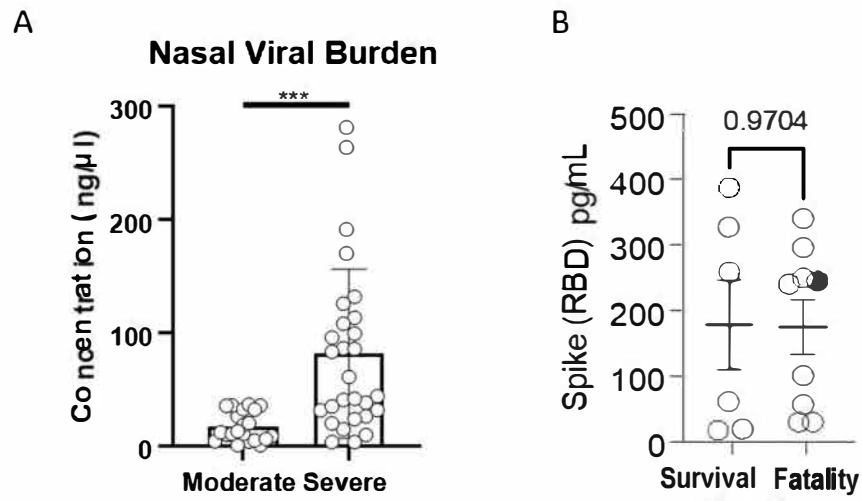

The figure displays a series of flow cytometry plots illustrating the isolation strategy for CD8<sup>+</sup>MHCII<sup>+</sup> T cells from whole blood. The process begins with an **Ungated** population, followed by selection for **Singlets**, **Single Cells**, and **Live Cells**. The next step involves selecting **CD45<sup>+</sup> Cells**, which are further divided into **WBCs** (White Blood Cells) and **Neutrophil Neg.** (Neutrophil Negative). The **CD11b<sup>+</sup> Cells** are then isolated, leading to the selection of **All Monocytes**. The final step shows the isolation of **CD8<sup>+</sup>MHCII<sup>+</sup> CD3<sup>+</sup> T cells**, which are further characterized as **T Cell Purity Check** and **B Cell Purity Check**.

The plots show various parameters measured at each stage:

- Ungated:** SSC-A vs. SSC-H.
- Singlets:** FSC-A vs. FSC-H.
- Single Cells:** SSC-H vs. FSC-A.
- Live Cells:** SSC-H vs. CD45.
- CD45<sup>+</sup> Cells:** SSC-H vs. FSC-A.
- WBCs:** CD66b vs. CD14.
- Neutrophil Neg.:** SSC-H vs. CD11b.
- CD11b<sup>+</sup> Cells:** CD16 vs. CD14.
- All Monocytes:** CD16 vs. CD14.
- CD8<sup>+</sup>MHCII<sup>+</sup> CD3<sup>+</sup> T cells:** CD8 vs. MHC II.
- T Cell Purity Check:** CD8 vs. MHC II.
- B Cell Purity Check:** CD19 vs. MHC II.
- CD3<sup>+</sup>CD19<sup>-</sup> Cells:** CD3 vs. CD19.
- CD3<sup>+</sup>CD19<sup>-</sup> Cells:** CD16 vs. CD8.
- Non-B Cells/CD3hi Cells:** CD16 vs. CD56.
- Live Cells:** SSC-H vs. FSC-A.
- No Cells:** P-selectin vs. CD45.

Supplemental Figure 3

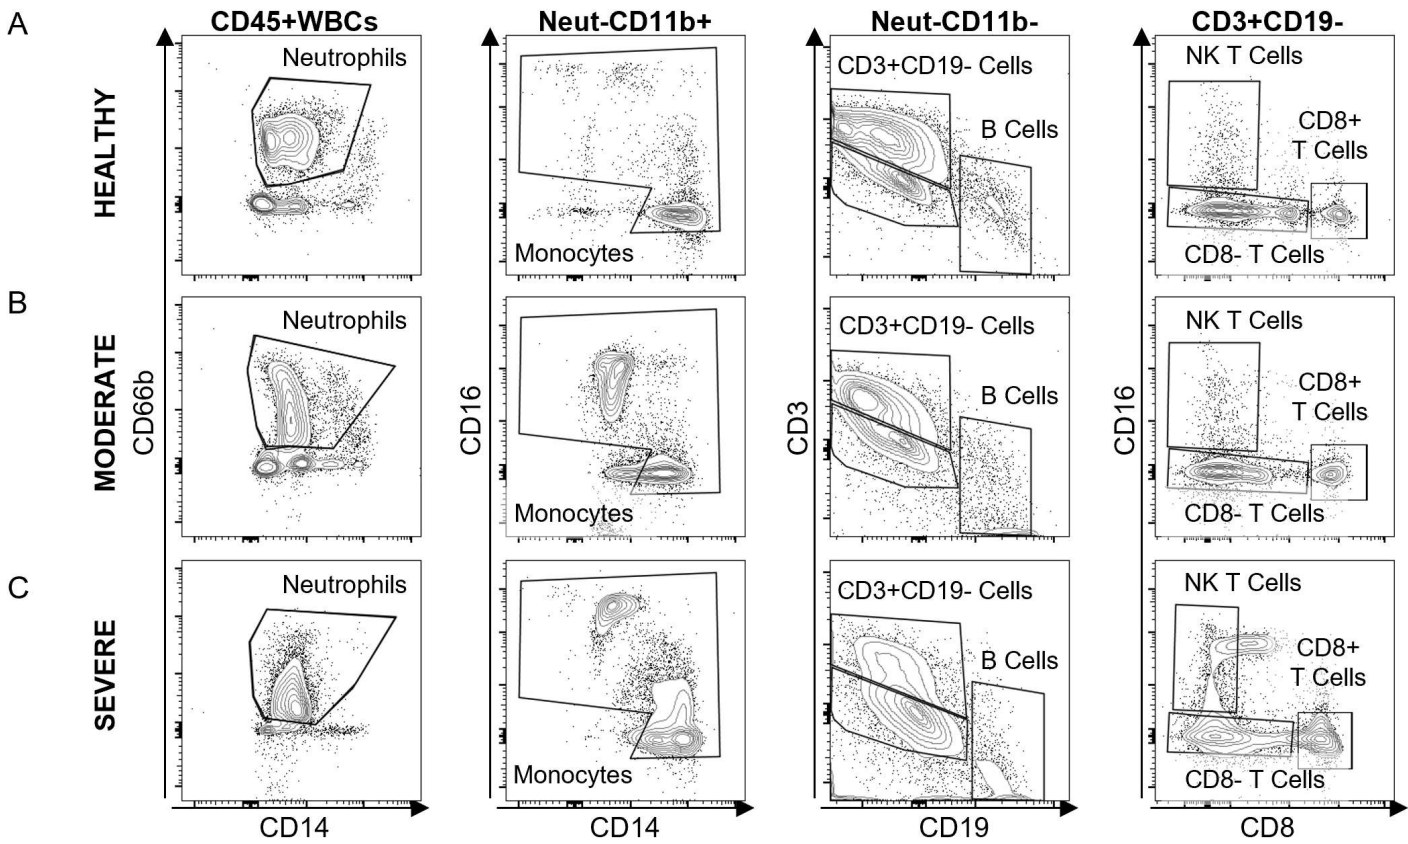

Supplemental Figure 4

A

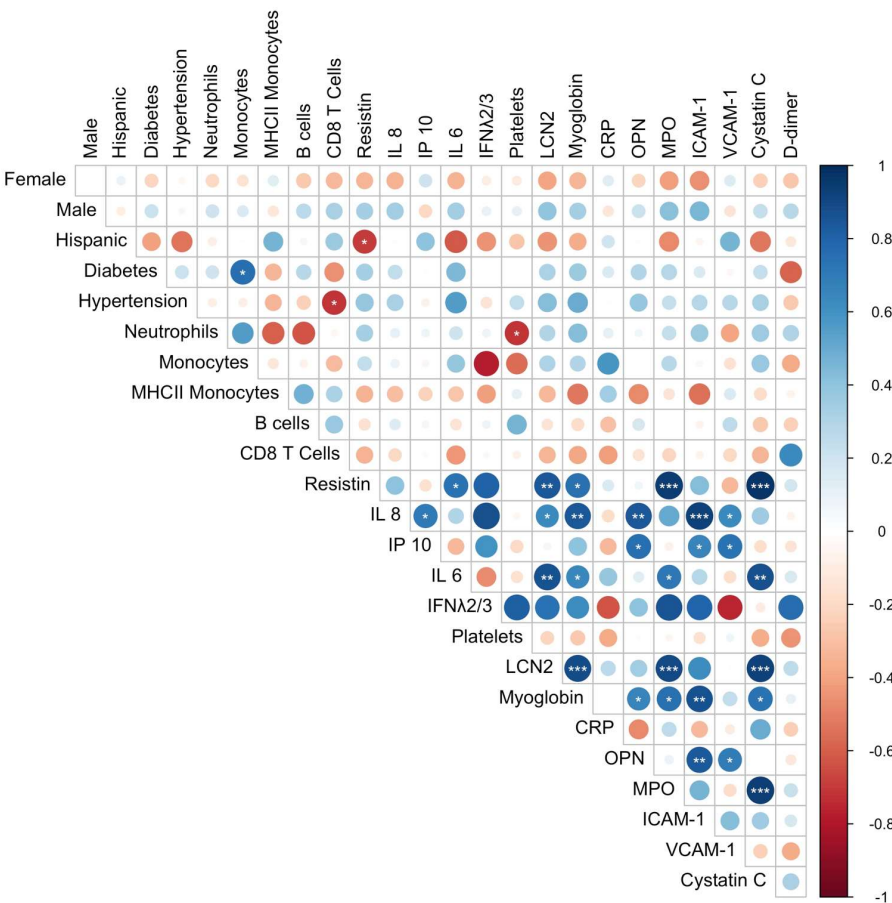

B

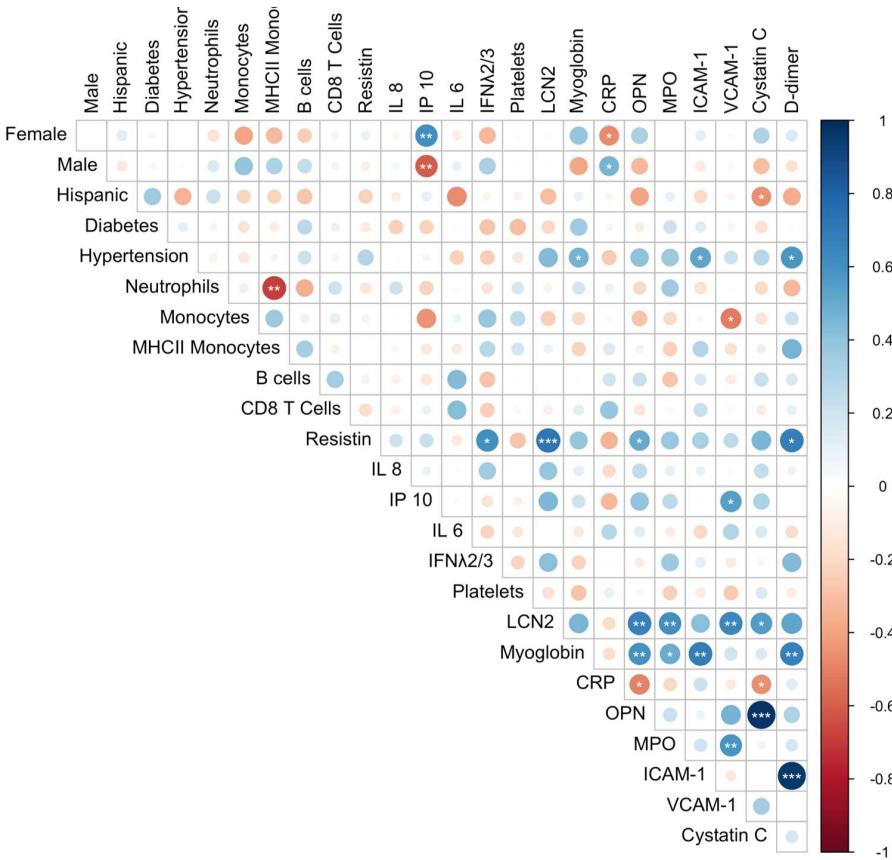

Supplement: MOESM1 [file 12889_2023_16462_MOESM1_ESM.pdf]
